# Supplementary material for: A silica-based SERS chip for rapid and ultrasensitive detection of fluoride ions triggered by a cyclic boronate ester cleavage reaction
Source: Royal Society of Chemistry journal article supplement (doi:10.1039/c6nr07545b), 2016-12-20
Supplement: c6nr07545b1.pdf [file c6nr07545b1.pdf]

## Supporting Information

### **Silica-based SERS Chip for Rapid and Ultrasensitive Detection of Fluoride Ion by Triggered Cyclic Boronate Ester Cleavage Reaction**

Jian Zhang,<sup>\*,a</sup> Lifang He,<sup>a</sup> Peirong Chen,<sup>a</sup> Chao Tian,<sup>a</sup> Jianping Wang,<sup>b</sup> Bianhua Liu,<sup>b</sup> Changlong Jiang,<sup>\*,b</sup> and Zhongping Zhang<sup>b,c</sup>

<sup>a</sup> Department of Applied Chemistry, Anhui Agricultural of University, Hefei, Anhui 230036, China.

<sup>b</sup>CAS Center for Excellence in Nanoscience, Institute of Intelligent Machines, Chinese Academy of Sciences, Hefei, Anhui 230031, China

<sup>c</sup>School of Chemistry and Chemical Engineering, Anhui University, Hefei, Anhui 230601, China

\*To whom correspondence should be addressed. E-mail: jianzhang@ahau.edu.cn; cljiang@iim.ac.cn.  
Fax: (+86) 551-65591156.

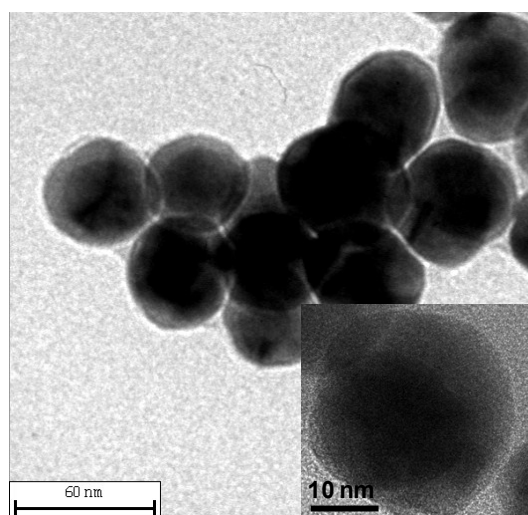

**Fig. S1** TEM and HRTEM images of the prepared Au@Ag NPs.

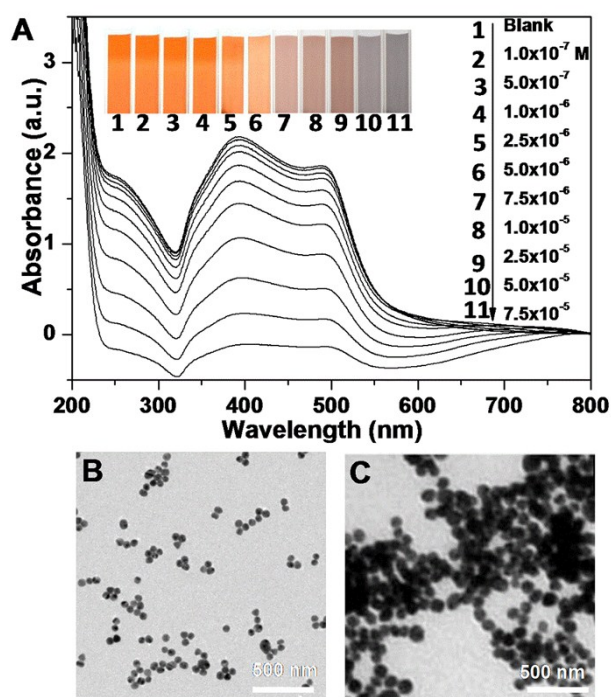

**Fig. S2** (A) UV-vis absorption spectra of Au@Ag NPs colloid with the increase of Diol concentration from  $1.0 \times 10^{-7}$  to  $7.5 \times 10^{-5}$  M. The TEM images of Au@Ag NPs states (B) in the absence and (C) in the presence of  $7.5 \times 10^{-5}$  M Diol.

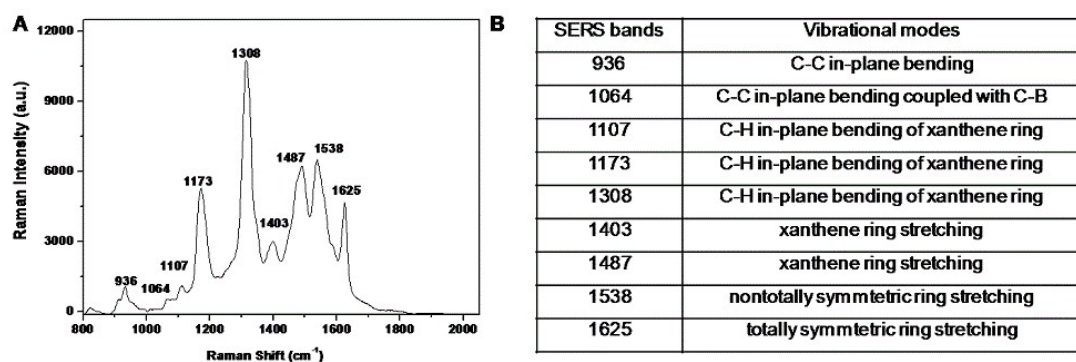

**Fig. S3** (A) SERS spectra of the pure Flu-PBA (the strong Raman peaks at 936, 1064, 1107, 1173, 1308, 1403, 1487, 1538 and 1625 $\text{cm}^{-1}$  are the same as that of Flu-PBA-Diol-Au@Ag NPs). (B) The SERS bands of the Flu-PBA and their vibrational mode assignments SERS bands.

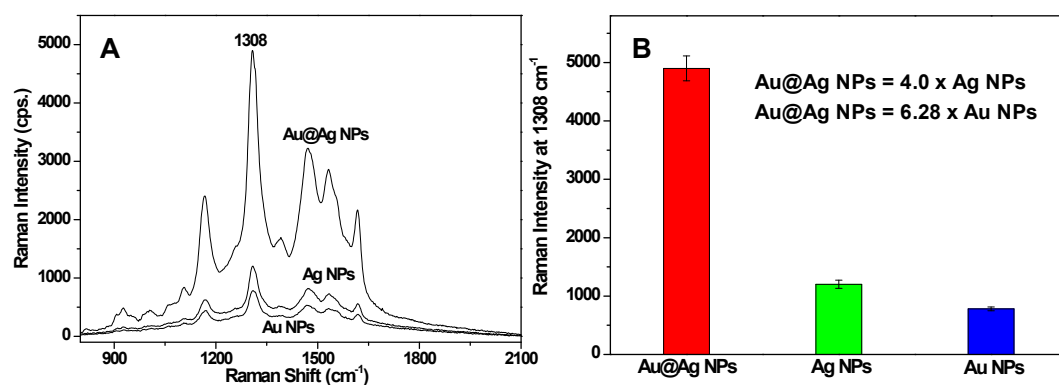

**Fig. S4** (A) SERS spectra of Flu-PBA-Diol-Au@Ag, Flu-PBA-Diol-Ag and Flu-PBA-Diol-Au NPs colloids, and (B) the comparison of enhancement effects of the three metal particle colloids. It can be estimated that the enhancement effect of Au@Ag NPs is ~6.28- and 4.0-fold those of pure Au and Ag NPs.

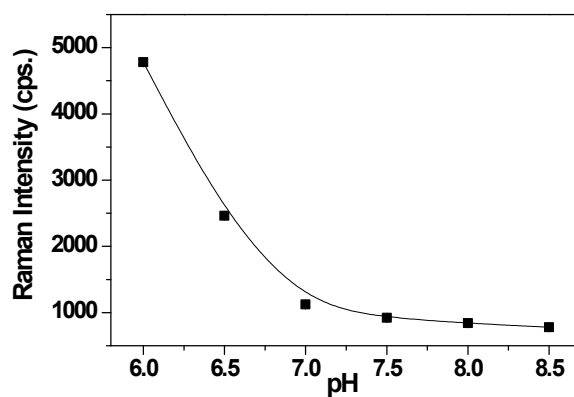

**Fig. S5** The variation of Raman intensity of Flu-PBA-Diol-Au@Ag NPs at  $1308\text{ cm}^{-1}$  with increasing pH values from 6.0 to 8.5. The conditions: 1.0 mL probe,  $1.0\text{ }\mu\text{M F}^-$ .

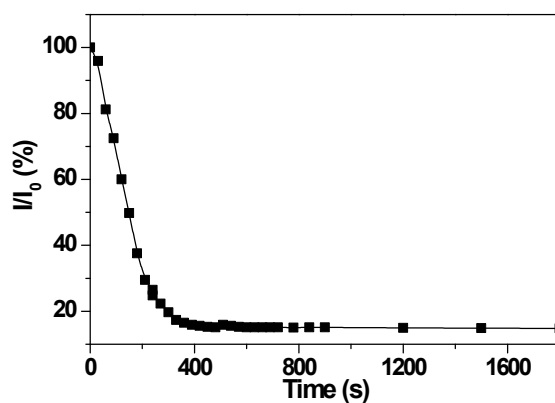

**Fig. S6** The variation of Raman intensity of Flu-PBA-Diol-Au@Ag NPs at  $1308\text{ cm}^{-1}$  with increasing incubation time after the addition of  $\text{F}^-$ . The conditions: 1.0 mL probe,  $1.0\text{ }\mu\text{M F}^-$ , pH 7.4.

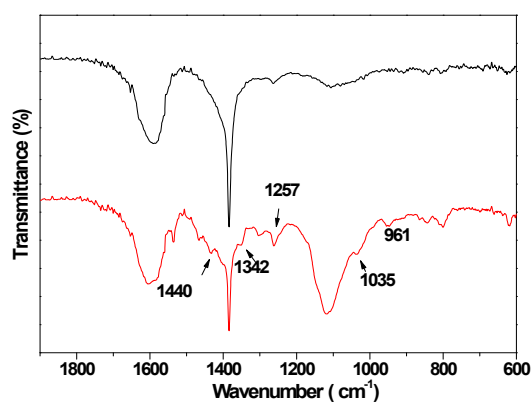

**Fig. S7** FTIR spectra of Flu-PBA-Diol-Au@Ag NPs (a) and the resulted Diol-Au@Ag NPs after centrifugation in the presence of  $\text{F}^-$  (b).

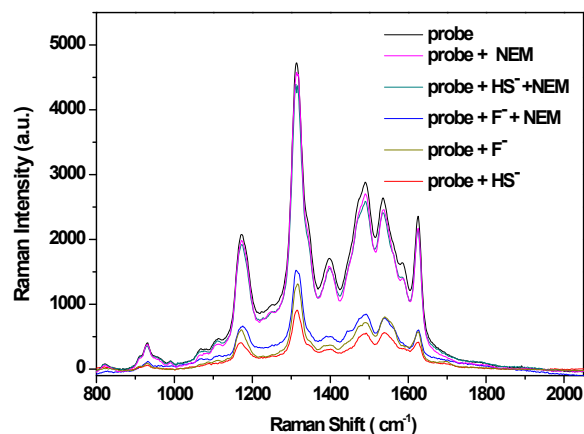

**Fig. S8** SERS responses of Flu-PBA-Diol-Au@Ag NPs probe to  $F^-$ ,  $HS^-$ , NEM,  $F^-$ +NEM, and  $HS^-$ +NEM ( $F^-$ : 1.00  $\mu M$ ;  $HS^-$ : 1.00  $\mu M$ ; NEM: 1.00  $\mu M$ ). The addition of NEM can effectively eliminate the interference of  $HS^-$ .

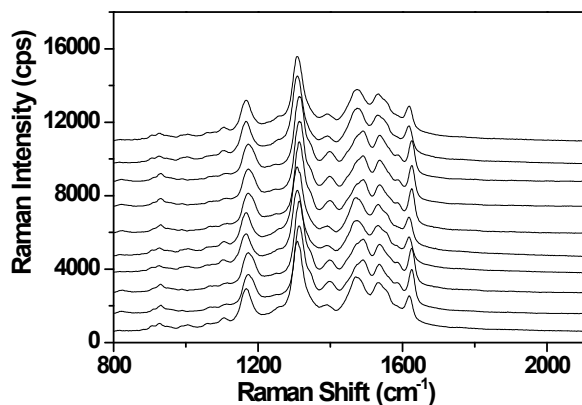

**Fig. S9** A series of SERS spectra obtained from the randomly selected 10 sites of the assembled SERS chip.

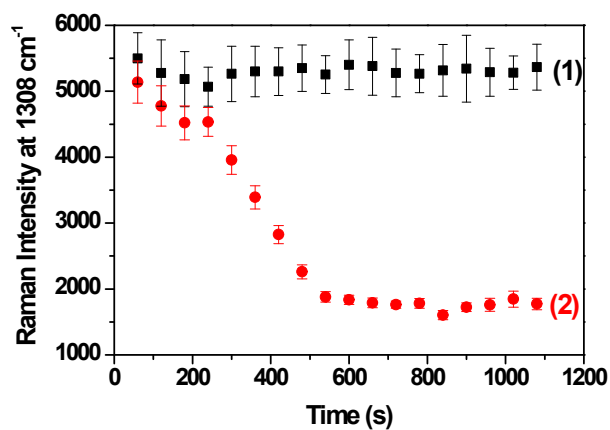

**Fig. S10** The variation of Raman intensity at  $1308\text{ cm}^{-1}$  (the data were collected at the interval of 60 s) by dropping 20  $\mu L$  of (1) pure water and (2)  $5.0 \times 10^{-7}\text{ M } F^-$  onto the assembled SERS chip.

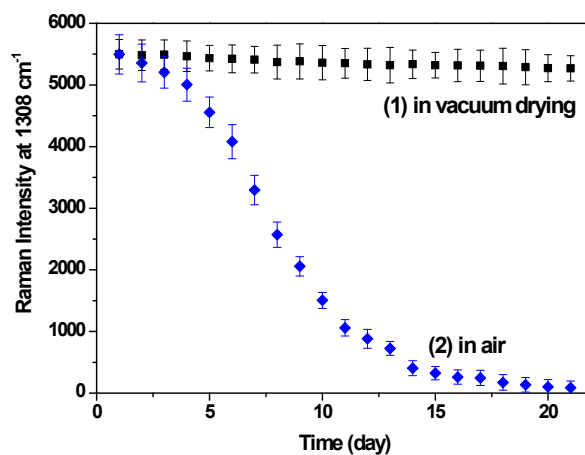

**Fig. S11** The variation of Raman intensity of the assembled SERS chip at  $1308\text{ cm}^{-1}$  (the data were collected at the interval of 1 day ) in the different conditions: (1) in vacuum drying and (2) in air.

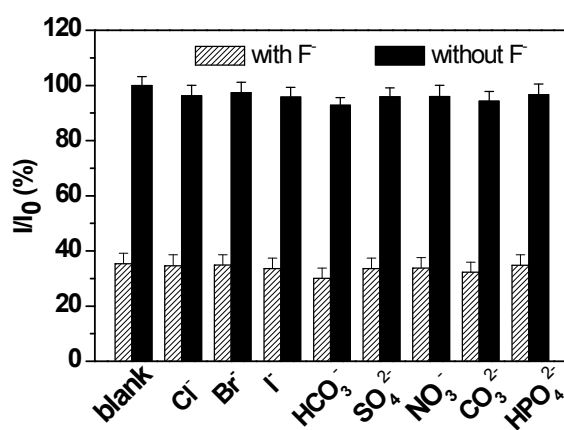

**Fig. S12** The selectivity of the silica-based SERS chip in addition of the other anions ( $1.0 \times 10^{-5}\text{ M}$ ) without and with the coexistence of  $\text{F}^-$  ( $1.0 \times 10^{-6}\text{ M}$ ). ( $I$  and  $I_0$  represent the Raman intensity at  $1308\text{ cm}^{-1}$  in the presence and absence of analytes, respectively).

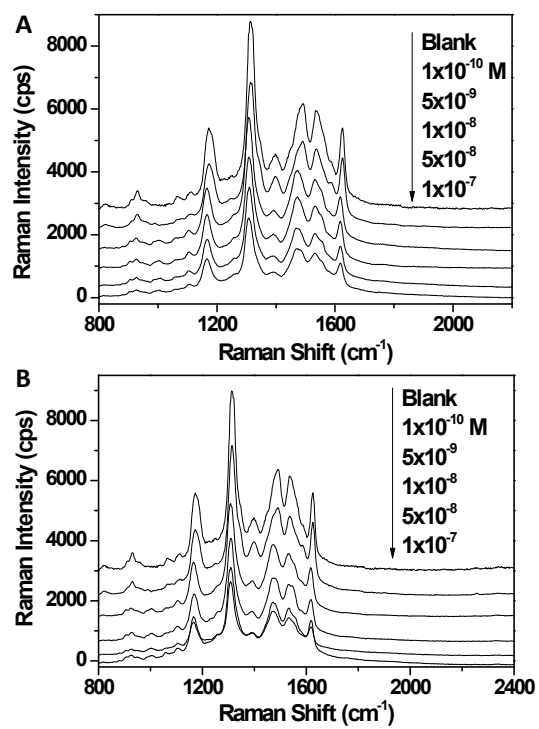

**Fig. S13** SERS detections of F<sup>-</sup> spiked with the different concentrations in (A) tap water, (B) lake water on the assembled SERS chip.
